# Supplementary material for: Simvastatin-induced breast cancer cell death and deactivation of PI3K/Akt and MAPK/ERK signalling are reversed by metabolic products of the mevalonate pathway
Source: PubMed Central journal article supplement (PMC4823053; doi:10.18632/oncotarget.6304), 2015-11-11
Supplement: oncotarget-07-2532-s001.pdf [file oncotarget-07-2532-s001.pdf]

## Simvastatin-induced breast cancer cell death and deactivation of PI3K/Akt and MAPK/ERK signalling are reversed by metabolic products of the mevalonate pathway

### Supplementary Material

**Supplementary table 1: Antibodies used for immunohistochemistry (IHC) staining and Western blots analysis**

| Purposes      | Antibodies                          | Manufacturers             |
|---------------|-------------------------------------|---------------------------|
| IHC           | cleaved caspase-3                   | Cell Signaling Technology |
|               | ki67                                | Merck Millipore           |
|               | PTEN                                | Cell Signaling Technology |
|               | p-Akt (Ser473)                      | Cell Signaling Technology |
|               | p-S6 ribosomal protein (Ser235/236) | Cell Signaling Technology |
|               | p-c-Raf (Tyr340/341)                | Santa Cruz Biotechnology  |
| Western blots | p-ERK1/2 (Thr202/Thy204)            | Cell Signaling Technology |
|               | caspase-8                           | Cell Signaling Technology |
|               | casepase-3                          | Cell Signaling Technology |
|               | PARP                                | Cell Signaling Technology |
|               | c-myc                               | Cell Signaling Technology |
|               | cyclin D1                           | Cell Signaling Technology |
|               | p21                                 | Cell Signaling Technology |
|               | p27                                 | Cell Signaling Technology |
|               | PTEN                                | Cell Signaling Technology |
|               | p-PTEN (Ser380/Thr382/383)          | Cell Signaling Technology |
|               | Akt                                 | Cell Signaling Technology |
|               | p-Akt (Ser473)                      | Cell Signaling Technology |
|               | mTOR                                | Cell Signaling Technology |
|               | p-mTOR (Ser2448)                    | Cell Signaling Technology |
|               | p70S6K                              | Cell Signaling Technology |
|               | p-p70S6K (Thr389)                   | Cell Signaling Technology |
|               | S6 ribosomal protein (S6RP)         | Cell Signaling Technology |
|               | p-S6RP (Ser235/236)                 | Cell Signaling Technology |
|               | 4E-BP1                              | Cell Signaling Technology |
|               | p-4E-BP1 (Thr37/36)                 | Cell Signaling Technology |
|               | c-Raf                               | Cell Signaling Technology |
|               | p-c-Raf (Ser338)                    | Cell Signaling Technology |
|               | MEK1/2                              | Cell Signaling Technology |
|               | p-MEK1/2 (Ser217/221)               | Cell Signaling Technology |
|               | ERK1/2                              | Cell Signaling Technology |
|               | p-ERK1/2 (Thr202/Tyr204)            | Cell Signaling Technology |
|               | p90 ribosomal S6 kinases (RSK1-3)   | Cell Signaling Technology |
|               | p-p90RSK(Ser380)                    | Cell Signaling Technology |
|               | β-actin                             | Cell Signaling Technology |
